# Supplementary material
Source: MDPI journal article supplement (https://www.mdpi.com/2624-5175/5/1/11)
Supplement: s1 [file s1]

## Supplementary

to

### *“Motus Vita Est: Fruit Flies Need to be More Active and Sleep Less to Adapt to Either a Longer or Harder Life”*

#### **Introduction to Supplementary**

We also tested whether the difference in locomotor activity and sleep between four strains might be related to the difference in some of metabolic indicators (see the main text), and whether the difference between strains in some of life history traits including survival rate and fecundity persisted after their arrival in the Novosibirsk (since September 2021). The methods testing survival rate and fecundity, tables and figures with results of this testing are included in this Supplementary.

#### **Methods in Brief**

##### *Testing Longevity and Fecundity*

In order to test the difference in survival time, 20 flies were kept in each of 40 tubes at room temperature and natural photoperiod. Males and females from four strains were compared when living on either standard or starch food substrate (Table S1 and Figure S1). The food vials were replaced, at least, twice a week after removing and counting dead flies. In total, 800 flies (200 per each strain) were counted in this analysis of survival time.

Fecundity was tested after rearing flies either on the food substrates used for their selection in the Moscow university or on the standard food substrate used in the Novosibirsk institute in the previous studies of locomotor activity and sleep. Male and female offspring of 7 groups consisting of 5 males and 5 females from each of 4 strains were compared at the Moscow food substrates, and male and female offspring of 8 such groups were compared on the standard

food substrate (in total, 70 and 80 parent flies, respectively). Starting from age 5 days, flies have been kept together in such 10-fly groups for one day. After their removal, the numbers of male and female offspring were calculated, three and two times with 2-day intervals, respectively (Table S2).

### *Statistical Analysis*

To test significance of difference between strains in survival time, the Kaplan–Meier estimator was used, and the log-rank (Mantel–Cox) test was applied for the comparisons of the Kaplan–Meier curves of four strains (Table S1).

Chi-square test,  $\chi^2$ , was used for the comparisons of fecundity of strains (Table S2).

### **Results in Brief**

Data on survival rate (Table S1 and Figure S1) confirmed that the difference between flies from the control strain and flies from three selected strains persisted over generations. For instance, artificial selection of flies for late reproduction yielded flies with longer than the control lifespan, while shorter lifespans were confirmed for flies from two strains adapted to a harder life on the adverse food substrates (Table S1 and Figure S1). The shortest lifespan was found in flies from the starch strain (Table S1 and Figure S1).

Moreover, selection on these two adverse food substrates also resulted in significant reductions of such direct measure of fitness as the number of offspring (Table S2).

## Supplementary Tables

**Table S1.** Pairwise comparisons of survival time.

| Food substrate                        |            | Standard |            |          |          | Starch   |            |          |          |
|---------------------------------------|------------|----------|------------|----------|----------|----------|------------|----------|----------|
| Strain                                |            | Mean     |            | Median   |          | Mean     |            | Median   |          |
|                                       |            | Mean     | SEM        | Median   | SEM      | Mean     | SEM        | Median   | SEM      |
| Survival time in mean and median days |            |          |            |          |          |          |            |          |          |
| Total                                 | Control    | 55.81    | 1.31       | 60       | 0.97     | 40.30    | 1.00       | 43       | 0.54     |
|                                       | Long-lived | 56.17    | 1.77       | 67       | 2.10     | 43.03    | 1.03       | 50       | 0.16     |
|                                       | Salt       | 43.29    | 1.32       | 45       | 2.02     | 38.66    | 0.66       | 38       | 0.68     |
|                                       | Starch     | 32.62    | 1.26       | 35       | 2.21     | 25.36    | 1.09       | 15       | 0.36     |
| Male                                  | Control    | 49.63    | 1.92       | 52       | 1.50     | 43.06    | 1.48       | 50       | 0.36     |
|                                       | Long-lived | 50.08    | 2.59       | 59       | 5.00     | 41.84    | 1.59       | 50       | 0.24     |
|                                       | Salt       | 35.89    | 1.73       | 35       | 2.50     | 39.97    | 1.10       | 42       | 1.42     |
|                                       | Starch     | 26.15    | 1.55       | 24       | 3.65     | 27.68    | 1.56       | 15       | 1.82     |
| Female                                | Control    | 61.98    | 1.55       | 67       | 2.03     | 37.54    | 1.29       | 42       | 0.86     |
|                                       | Long-lived | 62.26    | 2.27       | 74       | 1.28     | 44.22    | 1.31       | 50       | 0.39     |
|                                       | Salt       | 50.68    | 1.71       | 59       | 2.68     | 37.35    | 0.72       | 35       | 0.54     |
|                                       | Starch     | 39.09    | 1.77       | 40       | 1.38     | 23.03    | 1.50       | 15       | 0.51     |
| Pairwise comparison                   |            |          |            |          |          |          |            |          |          |
| Sex                                   |            | Male     |            |          |          | Male     |            |          |          |
| Strain                                |            | Control  | Long-lived | Salt     | Starch   | Control  | Long-lived | Salt     | Starch   |
| Control                               |            |          | 9.75**     | 31.04*** | 88.73*** |          | 0.45       | 16.80*** | 41.67*** |
| Long-lived                            |            | 14.02*** |            | 37.91*** | 69.84*** | 31.41*** |            | 15.66*** | 37.85*** |
| Salt                                  |            | 41.47*** | 60.38***   |          | 17.52*** | 9.30**   | 67.32***   |          | 16.05*** |
| Starch                                |            | 72.47*** | 75.54***   | 16.32*** |          | 30.76*** | 88.83***   | 18.07*** |          |
| Sex                                   |            | Female   |            |          |          | Female   |            |          |          |

Notes. Standard food substrate: the same standard diet as used for the flies in Table 1; Starch

food substrate: The same diet that was used for selection of Starch strain; Mean and Median:

Averaged and median survival time, days; SEM: Standard Error of these Mean and Median; \*\*p

< 0.01 and \*\*\*p < 0.001 were obtained using Log Rank (Mantel-Cox) test in *post hoc* pairwise

comparisons of four strains on survival time (the symbols are placed behind the estimate of  $\chi^2$ ).

See also notes to Table 1. These results are illustrated in Figure S1.

**Table S2.** Pairwise comparisons of fecundity of the control strain with each of other three strains.

| Food substrate<br>Strain | Number of offspring |      |        |          |      |        | Chi-square test for total |        |          |       |
|--------------------------|---------------------|------|--------|----------|------|--------|---------------------------|--------|----------|-------|
|                          | Moscow              |      |        | Standard |      |        | Moscow                    |        | Standard |       |
|                          | Total               | Male | Female | Total    | Male | Female | $\chi^2$                  | p      | $\chi^2$ | p     |
| Control                  | 574                 | 271  | 303    | 146      | 76   | 70     | Compared to Control       |        |          |       |
| Long-lived               | 578                 | 286  | 292    | 114      | 57   | 57     | 0.014                     | 0.906  | 3.938    | 0.047 |
| Salt                     | 219                 | 104  | 115    | 102      | 58   | 44     | 158.9                     | <0.001 | 7.806    | 0.005 |
| Starch                   | 161                 | 65   | 96     | 108      | 57   | 51     | 232.1                     | <0.001 | 5.685    | 0.017 |

Notes. Moscow: The same food substrates as used for selection of the strains in Moscow;

Standard: the same standard food substrate as used for the flies in Table 1;  $\chi^2$ : testing whether the number of offspring produced by each of three selected strains differ from that in the control strain.

## Supplementary Figure

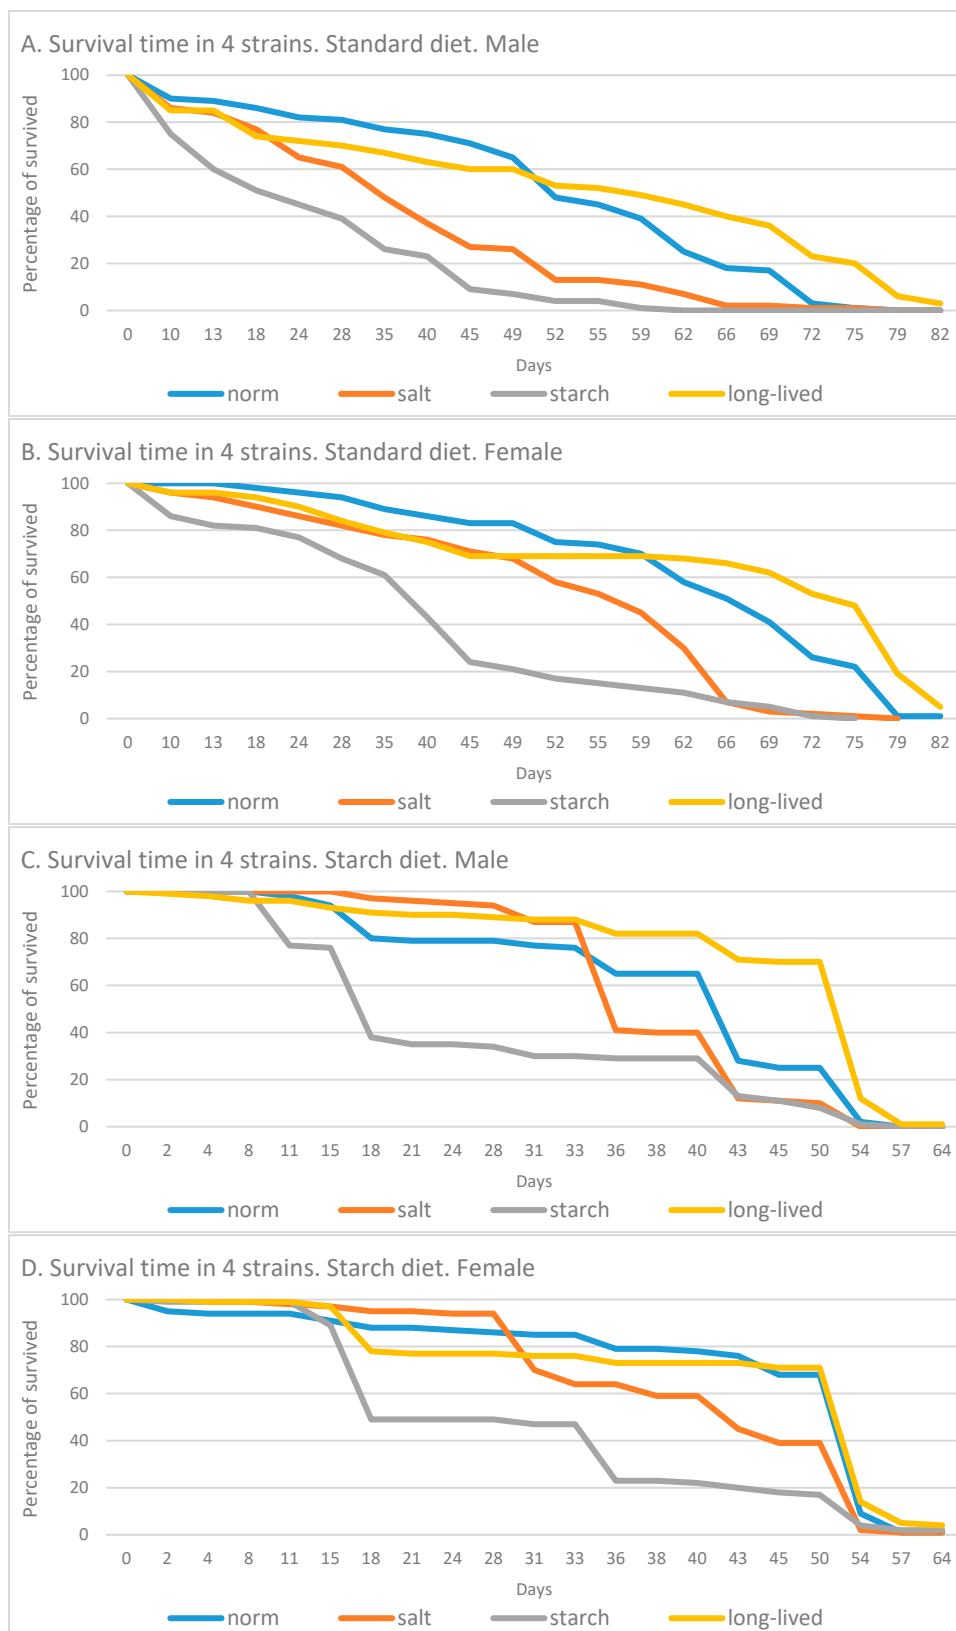

**Figure S1**
